# Supplementary material for: DNA Double-Strand Breaks Induced by Cavitational Mechanical Effects of Ultrasound in Cancer Cell Lines
Source: PLOS journal article supplement (doi:10.1371/journal.pone.0029012), 2012-01-03
Supplement: S4 (10.1371/journal.pone.0029012.s004) [file journal.pone.0029012.s004]

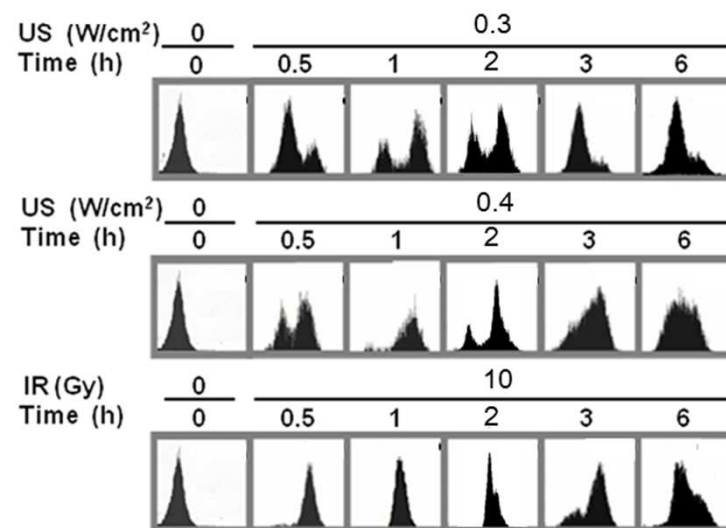

Supplementary Figure. 4
